# Supplementary material for: Emotional and Behavioral Trajectories of 2 to 9 Years Old Children Born to Opioid-Dependent Mothers
Source: Springer Nature journal article supplement (doi:10.1007/s10802-020-00766-w), 2021-01-12
Supplement: MOESM1 [file 18763516]

## Supporting Information

**Table S1**  
**Measures of Maternal and Infant Characteristics**

| <i>Measure</i>                                                 | <i>Assessment Time(s) / Items</i>                                                                                                                                                                                                                                                                                                                                                                    | <i>Coding</i>           |
|----------------------------------------------------------------|------------------------------------------------------------------------------------------------------------------------------------------------------------------------------------------------------------------------------------------------------------------------------------------------------------------------------------------------------------------------------------------------------|-------------------------|
| Edinburgh Postnatal Depression Scale (EDPS)                    | Pregnancy, 18 months / 10 items assessing depressive symptomatology over the previous 2 weeks, each ranging from 0 to 3                                                                                                                                                                                                                                                                              | Sum score, range 0-30   |
| Smoking                                                        | Pregnancy / Self-reported average number of cigarettes per day in each trimester                                                                                                                                                                                                                                                                                                                     | Average number          |
| Psychiatric illness                                            | Pregnancy / Self-report of treatment sought for any mental illness                                                                                                                                                                                                                                                                                                                                   | Binary (yes/no)         |
| Maternal nutrition                                             | Pregnancy / Total number of servings of fruit, vegetables, meat, bread, other cereals, milk, eggs consumed per week                                                                                                                                                                                                                                                                                  | Sum score, range 20-156 |
| Illicit drug use                                               | Birth – 4.5 years / Detailed self-reported drug use at each assessment point                                                                                                                                                                                                                                                                                                                         | Binary (yes/no)         |
| Parenting Stress                                               | 18 months / 16-item scale assessing caregiver exposure to a range of stressors including insufficient financial resources, inadequate accommodation, no social support, and relationship difficulties                                                                                                                                                                                                | Sum score, range 16-36  |
| Corporal punishment                                            | 18 months / Parent-Child Conflict Tactics Scale, 22 items assessing how parents disciplined their children using a range of methods including psychological aggression, non-violent discipline and physical assault. Parents completed the CTS-PC for every child in their care and were then assigned a physical punishment score based on the highest score obtained across all of their children. | Sum score, range 0-33   |
| Home Observation for the Measurement of the Environment (HOME) | 18 months / 6 scales incl. (1) emotional and verbal responsiveness of the caregiver, (2) acceptance of suboptimal behaviour and avoidance of restriction and punishment, (3) organization of the physical and temporal environment, (4) provision of appropriate play materials, (5) parental involvement with the child, and (6) opportunities for variety in daily stimulation                     | Sum score, range 19-45  |
